# Supplementary material for: Development of Light, Strong, and Water-Resistant PVA Composite Aerogels
Source: MDPI journal article supplement (doi:10.3390/nano14090745), 2024-04-24
Supplement: s1 [file s1]

**(a)**

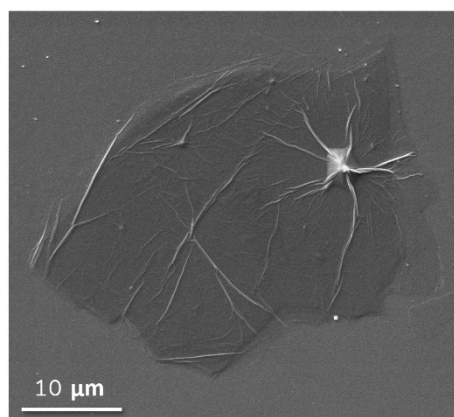

**(b)**

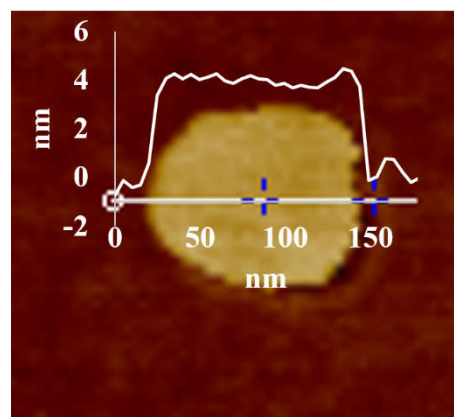

**Figure S1.** (a) SEM and (b) AFM images of GO nanosheets.

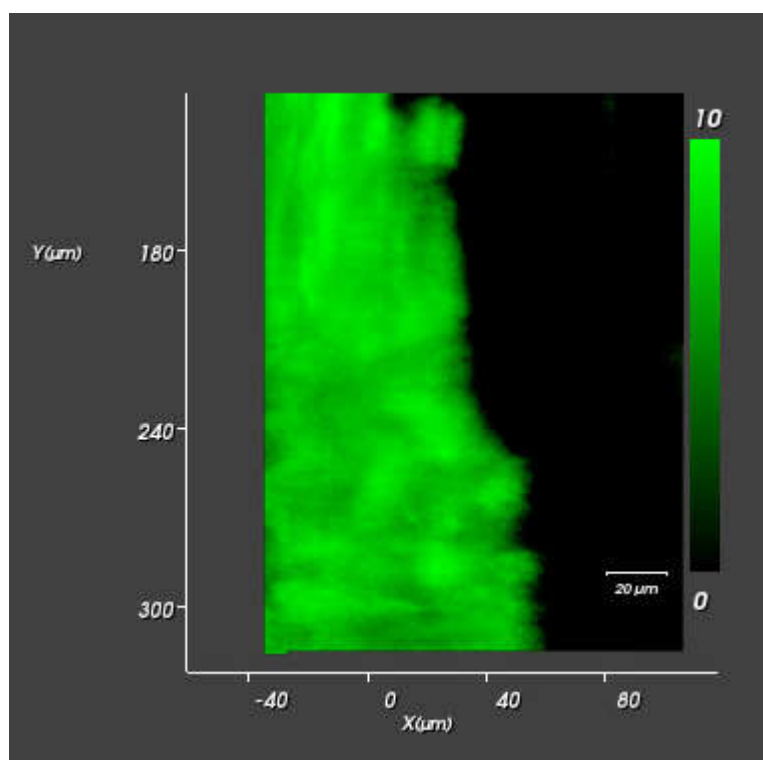

**Figure S2.** Raman mapping of PGO 2 aerogel demonstrating the distribution of GO nanosheets.

**(a)**

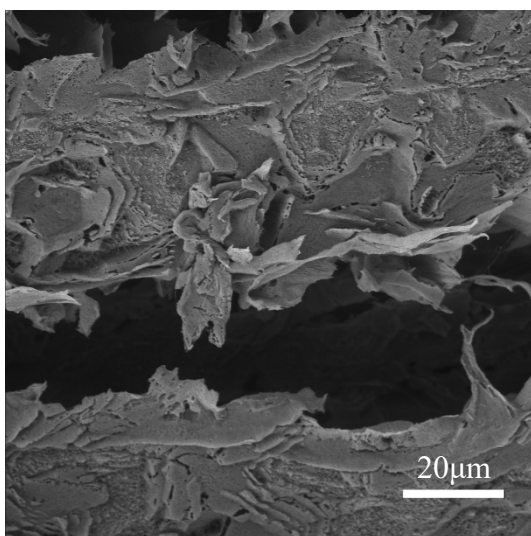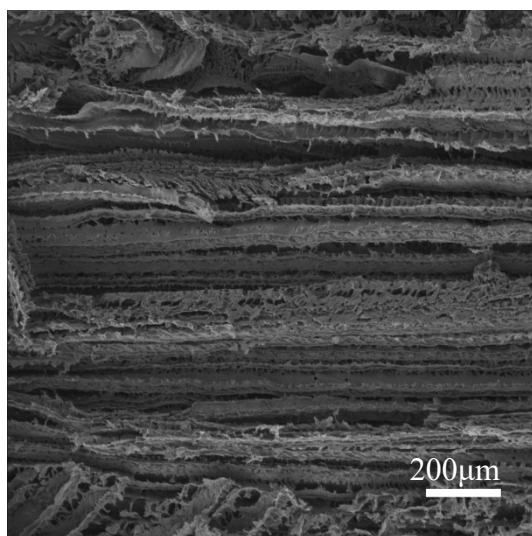

**(b)**

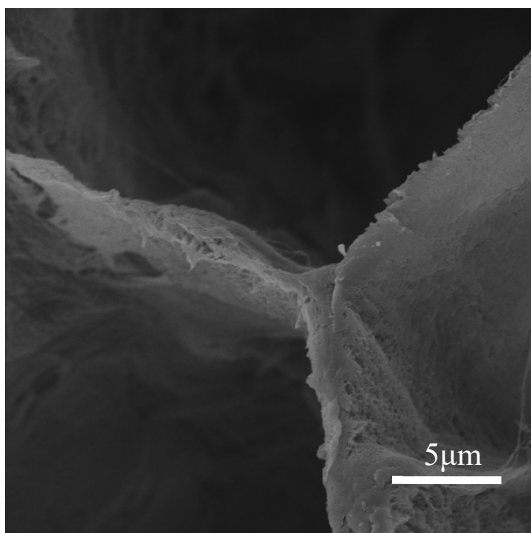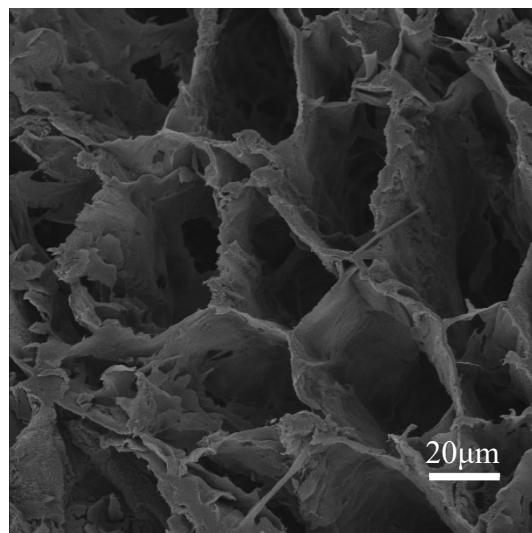

**Figure S3.** SEM images of A-PGO 2 along (a) longitudinal, and (b) transverse directions.
