# Supplementary material for: Development of Light, Strong, and Water-Resistant PVA Composite Aerogels
Source: Nanomaterials (Basel). 2024 Apr 24;14(9):745. doi: 10.3390/nano14090745 (PMC11085475; doi:10.3390/nano14090745)
Supplement: Supplementary file 1 [file nanomaterials-14-00745-s001.zip]

Archive with 4 entries (4 files):
- Supplementary Data.pdf
- supplementary Video S1.mp4
- supplementary Video S2.mp4
- Supplementary Video V3.mp4
